# Supplementary material for: Mechanism of Ganglioside Receptor Recognition by Botulinum Neurotoxin Serotype E
Source: MDPI journal article supplement (doi:10.3390/ijms22158315), 2021-08-02

## Supplementary information

**Figure S1.** SDS PAGE analysis of Hc/E samples. **(a)** Purified sample used for ITC and crystallisation experiments (lane 1). **(b)** Purified FLAG-tagged sample used for ganglioside-binding assays (lane 2).

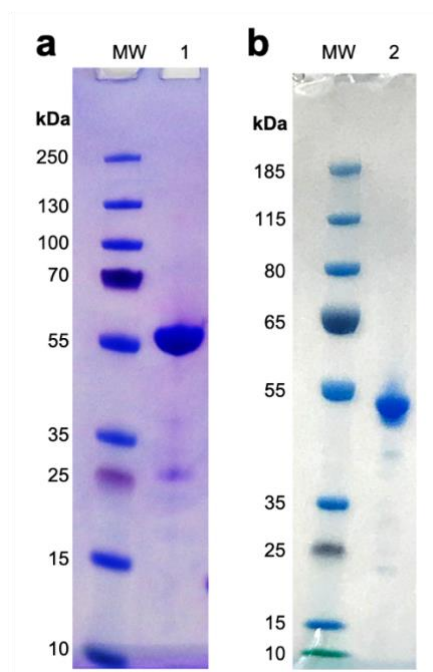

Supplement: s1 [file s1]
